# Supplementary material
Source: PubMed Central journal article supplement (PMC6540762)
Supplement: NIHMS1030643-supplement-SI.pdf [file NIHMS1030643-supplement-SI.pdf]

# Defect-Induced Near-Infrared Photoluminescence of Single-Walled Carbon Nanotubes Treated with Polyunsaturated Fatty Acids

Cheuk Fai Chiu,<sup>1</sup> Wissam A. Saidi,<sup>2</sup> Valerian E. Kagan,<sup>3</sup> and Alexander Star<sup>1,4\*</sup>

<sup>1</sup>Department of Chemistry, <sup>2</sup>Mechanical Engineering and Materials Science, <sup>3</sup>Environmental and Occupational Health, and <sup>4</sup>Bioengineering, University of Pittsburgh, Pittsburgh, Pennsylvania 15260, United States

## Table of Contents

|                                                                                                                                                                                                                                                                                                                                                                                                                                            |   |
|--------------------------------------------------------------------------------------------------------------------------------------------------------------------------------------------------------------------------------------------------------------------------------------------------------------------------------------------------------------------------------------------------------------------------------------------|---|
| <b>Figure S1.</b> EE maps of CoMoCAT SWCNTs a) before and b) after reaction with linoleic acid. Panel c) shows the spectral changes over 60 mins (spectra taken every 5 mins). d) vis-NIR absorption spectra of SWCNTs before and after reaction. ....                                                                                                                                                                                     | 2 |
| <b>Figure S2.</b> Control reactions with a) only SWCNTs and linoleic acid (no surfactant), b) SWCNTs and sodium cholate (no linoleic acid), and c) sodium cholate and linoleic acid (no SWCNTs). d) Linoleic acid pretreated with morin (250 µg / mL) to inhibit the autoxidation by terminating the radical chain reactions. SWCNTs exposed to pretreated linoleic acid showed no increase in E <sub>11</sub> <sup>-</sup> emission. .... | 3 |
| <b>Figure S3.</b> Spectra of SWCNTs / LA-OOH reaction using different surfactants. Sodium cholate (SC) at a) 0.1 wt. % and b) 1 wt. %, sodium dodecyl sulfate (SDS) at c) 0.1 wt. % and d) 1 wt. %, and dodecylbenzene sulfonate (SDBS) at e) 0.1 wt. % and f) 1 wt. %. ....                                                                                                                                                               | 4 |
| <b>Figure S4.</b> HRXPS spectra of carbon peak of the SWCNTs (a) before and (b) after LA-OOH reaction..                                                                                                                                                                                                                                                                                                                                    | 5 |
| <b>Figure S5.</b> a) The absorption spectra of the pristine and the oxygen-doped CNTs. Optimum adsorption configuration of the CNT with b) ether-perpendicular c) epoxide-parallel, d) O <sub>2</sub> -parallel, e) O <sub>2</sub> -perpendicular, and f) O <sub>3</sub> -perpendicular. ....                                                                                                                                              | 5 |
| <b>Figure S6.</b> Emission spectra of SWCNTs reacted with a) γ-linolenic acid (18:3), b) stearic acid (18:0), and c) stearyl-cardiolipin (14:0).....                                                                                                                                                                                                                                                                                       | 6 |
| <b>Figure S7.</b> Emission spectra of SWCNTs reacted with a) autoxidized cardiolipin (18:2), and b) non-oxidized cardiolipin (18:2).....                                                                                                                                                                                                                                                                                                   | 6 |
| <b>Figure S8.</b> Emission spectra of SWCNTs treated with linoleic acid before, after illumination, and in the presence of diethylenetriaminepentaacetic acid (DTPA). ....                                                                                                                                                                                                                                                                 | 6 |
| <b>Figure S9.</b> SWCNTs treated with antioxidants, a) ascorbic acid (250 mM) and b) morin (250 µg / mL), before subjected to linoleic acid hydroperoxide and 566 nm excitation light for one hour. No evolution of the E <sub>11</sub> <sup>-</sup> emission was observed.....                                                                                                                                                            | 7 |
| <b>Figure S10.</b> Reaction control and product isolation. SWCNTs were a) reacted with LA-OOH, and b) analyzed again after being stored in the dark for 1 week. Another sample was c) reacted with LA-OOH, and d) dialyzed to remove linoleic acids and surfactants, and re-dispersed in bovine serum albumin (1 wt. %) in water. ....                                                                                                     | 7 |
| <b>Figure S11.</b> Emission spectra of sodium cholate coated SWCNTs/LA taken after sonication for 0, 10 and 60 minutes under normal laboratory lighting conditions. ....                                                                                                                                                                                                                                                                   | 8 |
| <b>Figure S12.</b> EE maps of raw a) (6,5) purified HiPco and b) CoMoCAT (6,5) SWCNTs. ....                                                                                                                                                                                                                                                                                                                                                | 8 |
| <b>Table S1.</b> Reaction condition and calculations for wavelength-dependence experiment. ....                                                                                                                                                                                                                                                                                                                                            | 4 |

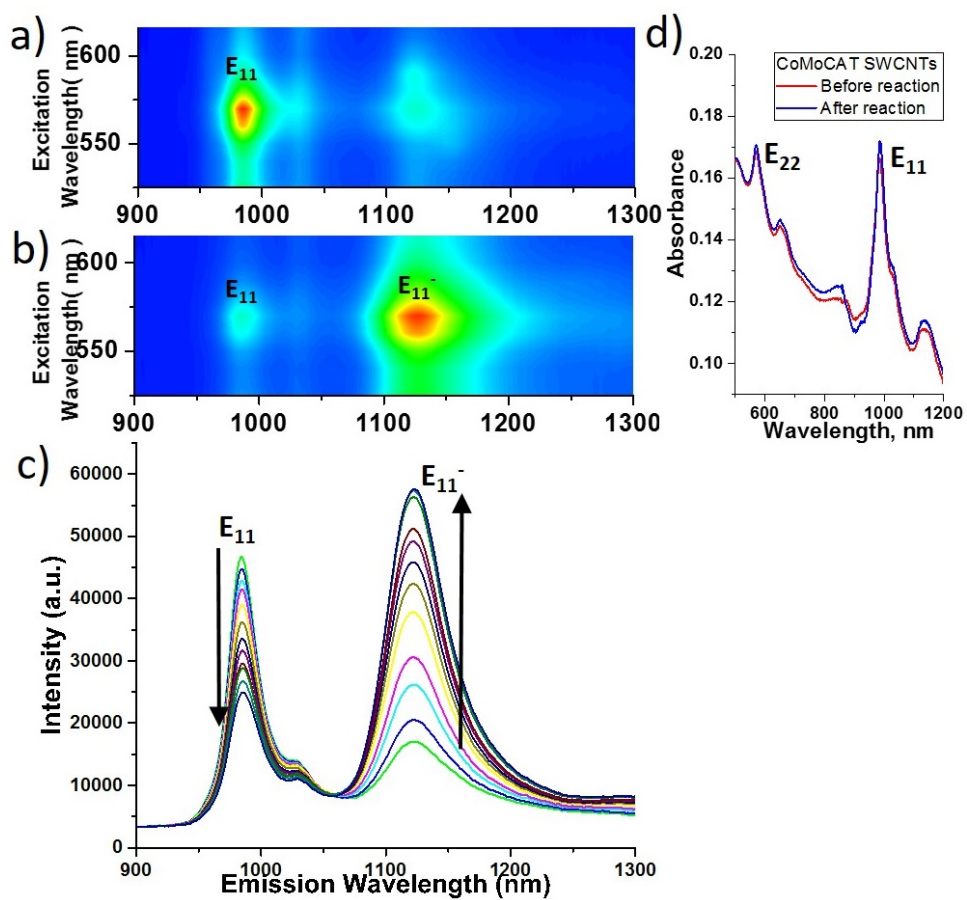

**Figure S1.** EE maps of CoMoCAT SWCNTs a) before and b) after reaction with linoleic acid. Panel c) shows the spectral changes over 60 mins (spectra taken every 5 mins). d) vis-NIR absorption spectra of SWCNTs before and after reaction.

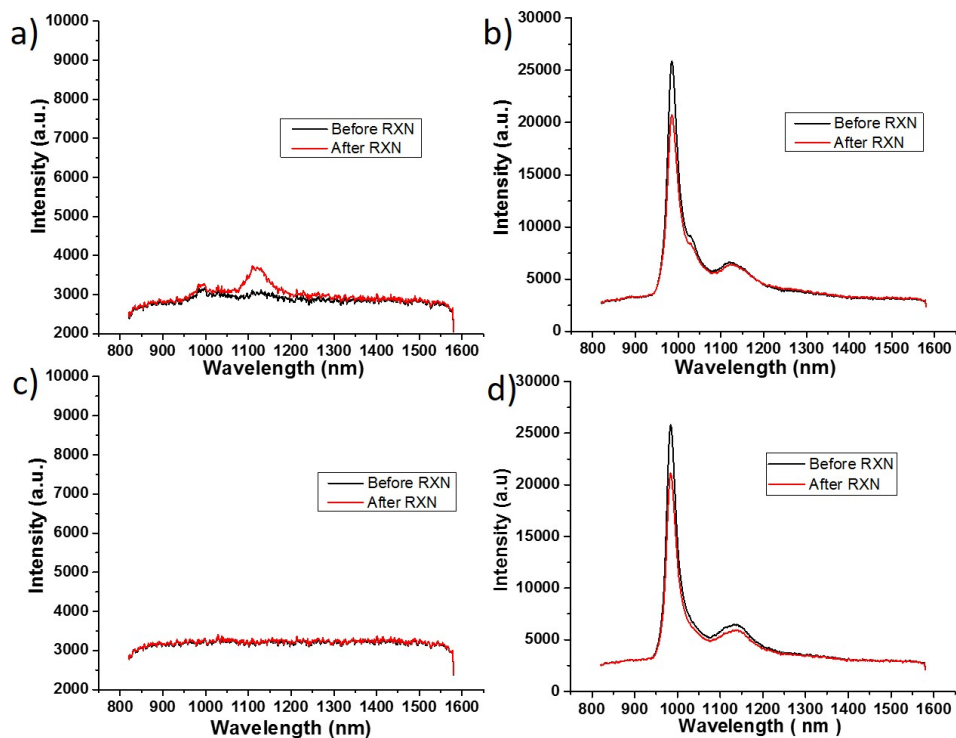

**Figure S2.** Control reactions with a) only SWCNTs and linoleic acid (no surfactant), b) SWCNTs and sodium cholate (no linoleic acid), and c) sodium cholate and linoleic acid (no SWCNTs). d) Linoleic acid pretreated with morin (250 μg / mL) to inhibit the autoxidation by terminating the radical chain reactions. SWCNTs exposed to pretreated linoleic acid showed no increase in  $E_{11}^-$  emission.

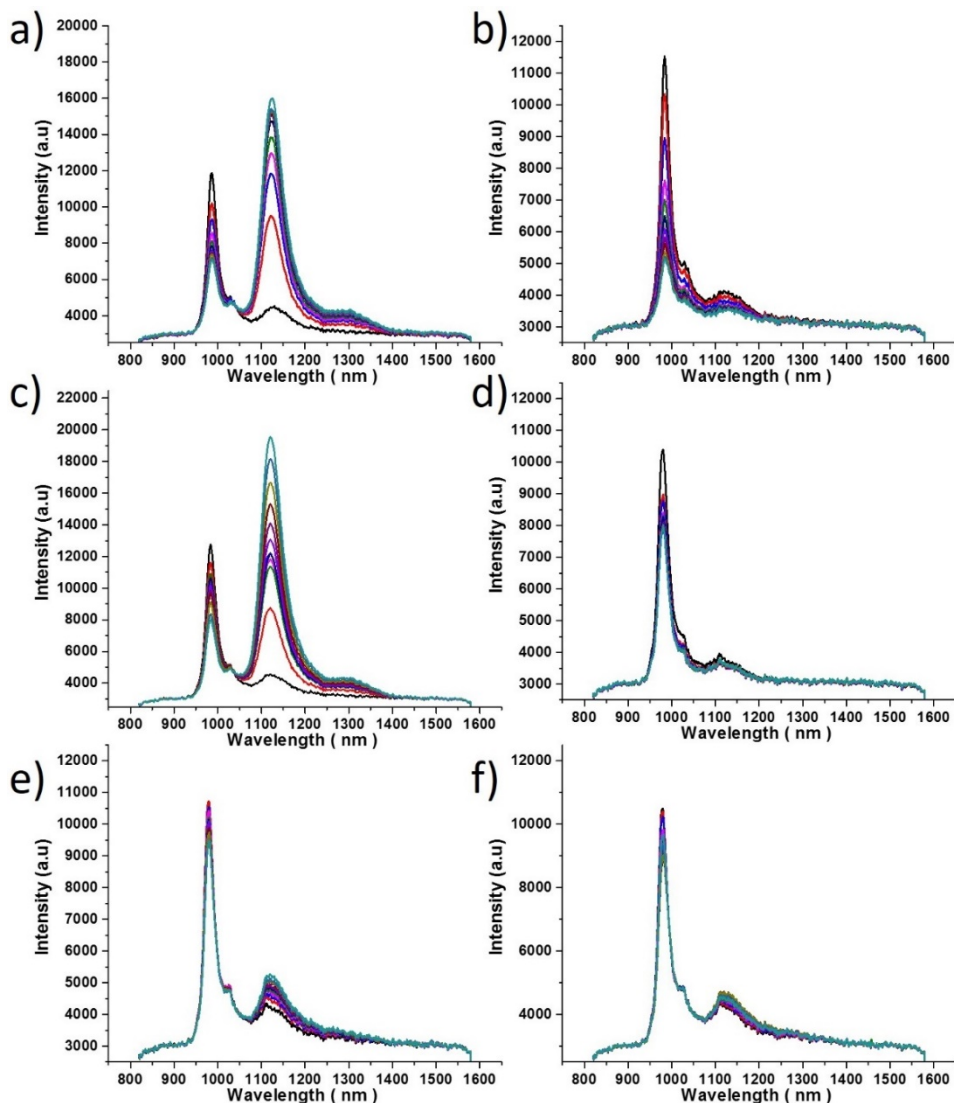

**Figure S3.** Spectra of SWCNTs / LA-OOH reaction using different surfactants. Sodium cholate (SC) at a) 0.1 wt. % and b) 1 wt. %, sodium dodecyl sulfate (SDS) at c) 0.1 wt. % and d) 1 wt. %, and dodecylbenzene sulfonate (SDBS) at e) 0.1 wt. % and f) 1 wt. %.

**Table S1.** Reaction conditions and calculations for wavelength-dependence experiment.

| Wavelength<br>(nm) | Power density<br>(mW/cm <sup>2</sup> ) | Photon flux<br>(photons per second) | $\Delta E_{11}$ | Apparent quantum efficiency (AQE) | Normalized AQE |
|--------------------|----------------------------------------|-------------------------------------|-----------------|-----------------------------------|----------------|
| 666                | 2.93                                   | 9.82E+15                            | 1329            | 1.35E-13                          | 0.11           |
| 566                | 7.49                                   | 2.13E+16                            | 26111           | 1.22E-12                          | 1.00           |
| 466                | 14.22                                  | 3.34E+16                            | 1420            | 4.26E-14                          | 0.03           |
| 366                | 5.18                                   | 9.54E+15                            | 1431            | 1.50E-13                          | 0.12           |
| 235                | 3.14                                   | 3.71E+15                            | 89              | 2.40E-14                          | 0.02           |

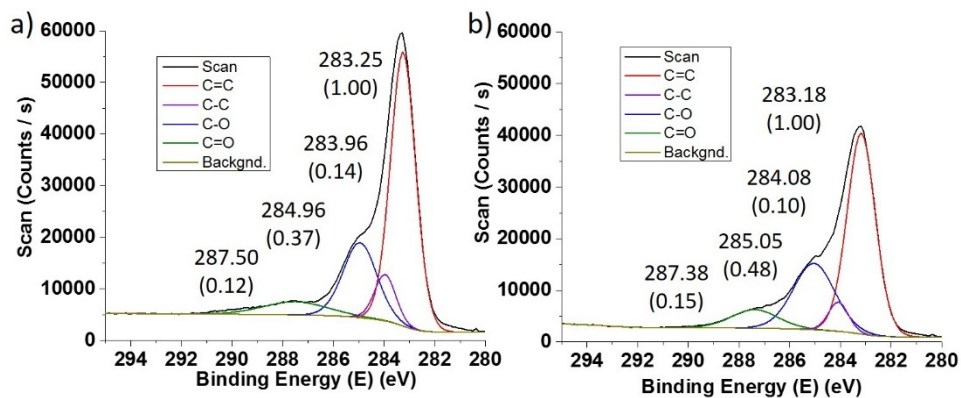

**Figure S4.** HRXPS spectra of carbon peak of the SWCNTs (a) before and (b) after LA-OOH reaction.

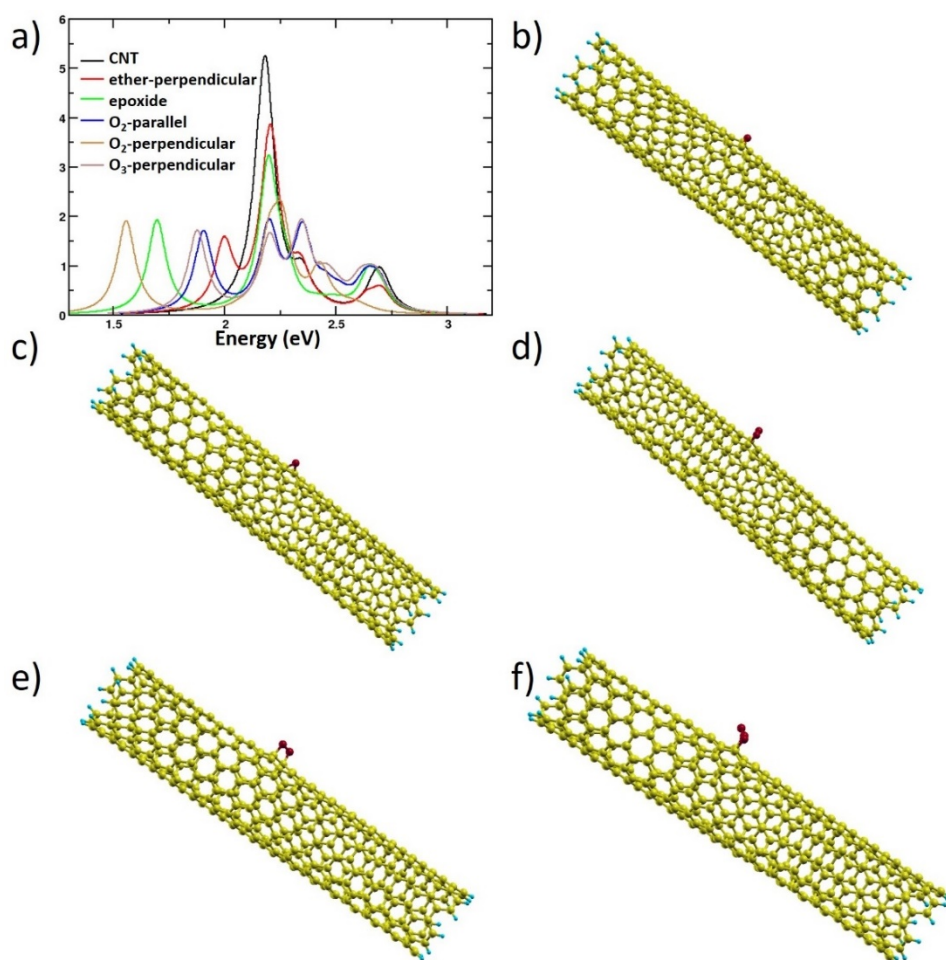

**Figure S5.** a) The absorption spectra of the pristine and the oxygen-doped CNTs. Optimum adsorption configuration of the CNT with b) ether-perpendicular c) epoxide-parallel, d) O<sub>2</sub>-parallel, e) O<sub>2</sub>-perpendicular, and f) O<sub>3</sub>-perpendicular.

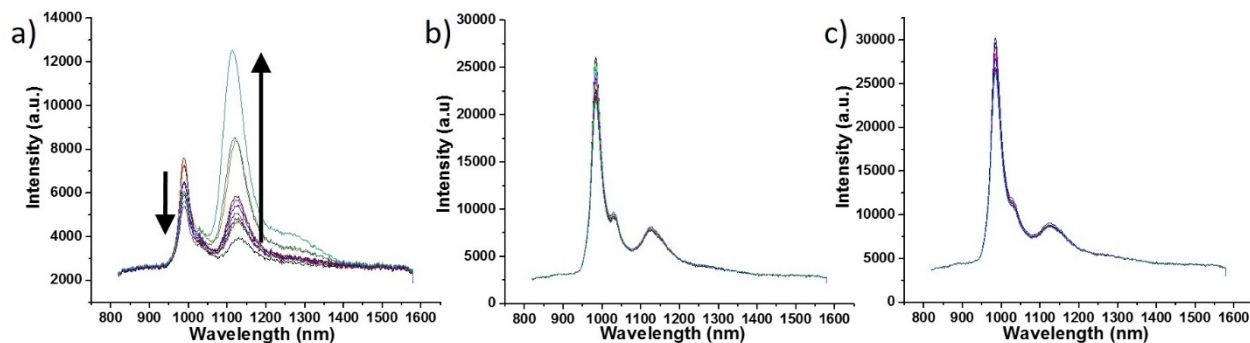

**Figure S6.** Emission spectra of SWCNTs reacted with a)  $\gamma$ -linolenic acid (18:3), b) stearic acid (18:0), and c) stearyl-cardiolipin (14:0).

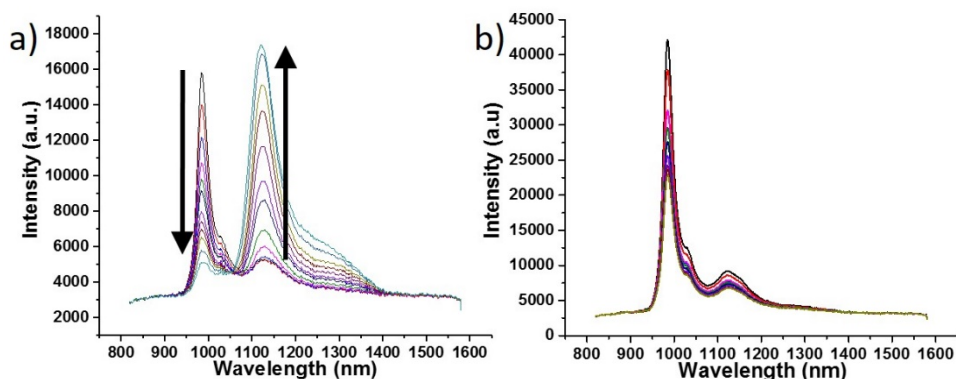

**Figure S7.** Emission spectra of SWCNTs reacted with a) autoxidized cardiolipin (18:2), and b) non-oxidized cardiolipin (18:2).

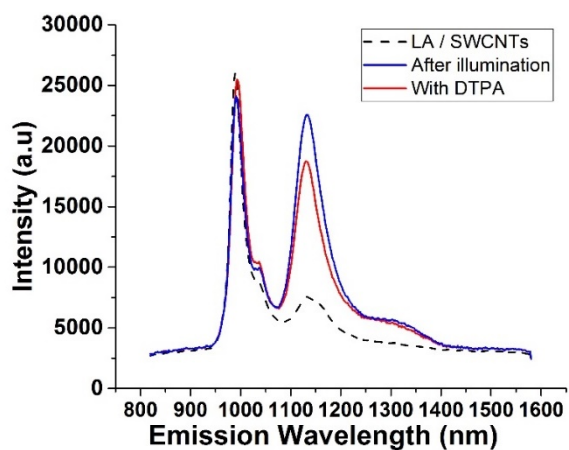

**Figure S8.** Emission spectra of SWCNTs treated with linoleic acid before, after illumination, and in the presence of diethylenetriaminepentaacetic acid (DTPA).

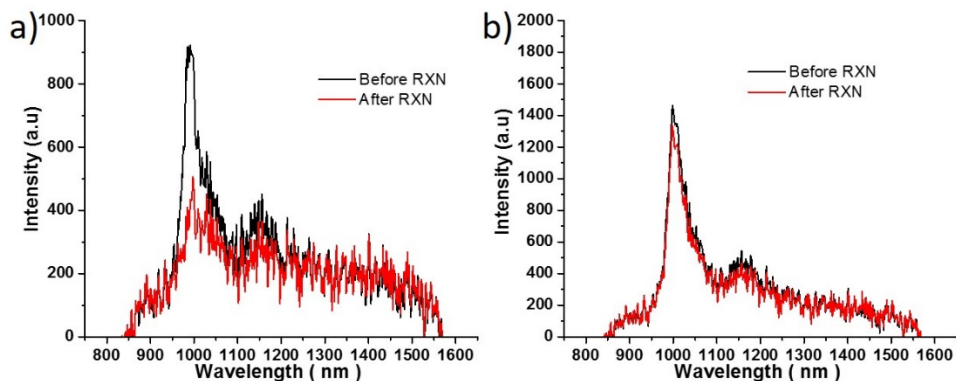

**Figure S9.** SWCNTs treated with antioxidants, a) ascorbic acid (250 mM) and b) morin (250  $\mu\text{g} / \text{mL}$ ), before subjected to linoleic acid hydroperoxide and 566 nm excitation light for one hour. No evolvement of the  $E_{11}$  emission was observed.

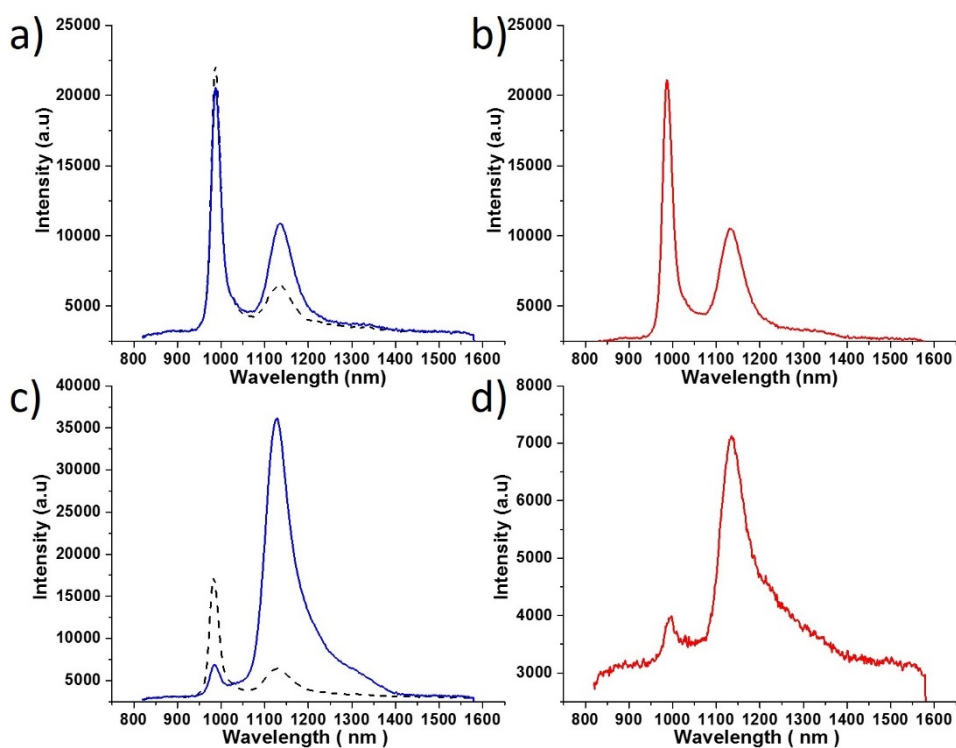

**Figure S10.** Reaction control and product isolation. SWCNTs were a) reacted with LA-OOH, and b) analyzed again after being stored in the dark for 1 week. Another sample was c) reacted with LA-OOH, and d) dialyzed to remove linoleic acids and surfactants, and re-dispersed in bovine serum albumin (1 wt. %) in water.

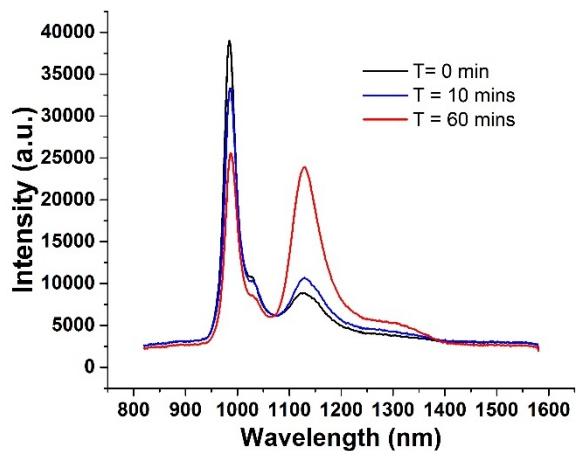

**Figure S11.** Emission spectra of sodium cholate coated SWCNTs/LA taken after sonication for 0, 10 and 60 minutes under normal laboratory lighting conditions.

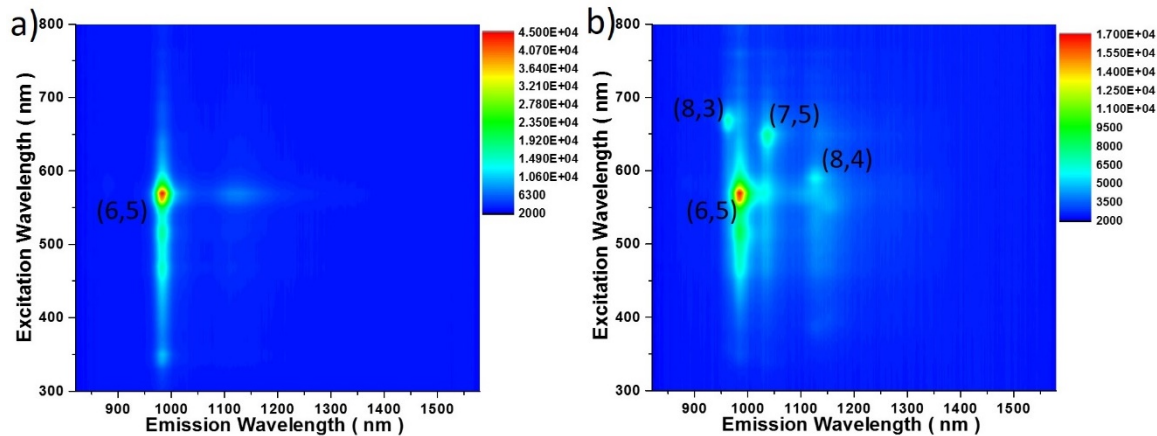

**Figure S12.** EE maps of raw a) (6,5) purified HiPco and b) CoMoCAT (6,5) SWCNTs.
